# Supplementary material
Source: publisher figshare collection journal article supplement (https://asha.figshare.com/articles/dataset/_/19119539)
Supplement: Supplementary file 2 [file 1]

**Supplemental Material S2.** List of statewide stay-at-home and early intervention telehealth policies.

| <b>State<sup>a</sup></b> | <b>Prior to COVID-19, was there a permanent reimbursement policy for licensed EI providers who use telehealth?</b> | <b>Was there a statewide "stay-at-home" directive?</b> | <b>Was there a statewide suspension of in-person EI services?<sup>b</sup></b> | <b>Approximate number of days between "stay-at-home" and approval of telehealth services for EI providers?<sup>c</sup></b> | <b>Approximate number of days between statewide suspension of in-person services and approval of telehealth services for EI providers?</b> |
|--------------------------|--------------------------------------------------------------------------------------------------------------------|--------------------------------------------------------|-------------------------------------------------------------------------------|----------------------------------------------------------------------------------------------------------------------------|--------------------------------------------------------------------------------------------------------------------------------------------|
| AL                       | No                                                                                                                 | Yes                                                    | Yes                                                                           | 6                                                                                                                          | 6                                                                                                                                          |
| AK                       | No                                                                                                                 | Yes                                                    | -                                                                             | 0                                                                                                                          | -                                                                                                                                          |
| AZ                       | No                                                                                                                 | Yes                                                    | -                                                                             | 0                                                                                                                          | -                                                                                                                                          |
| AR                       | No                                                                                                                 | No                                                     | Yes                                                                           | n/a                                                                                                                        | 11                                                                                                                                         |
| CA                       | No                                                                                                                 | Yes                                                    | -                                                                             | 11                                                                                                                         | -                                                                                                                                          |
| CO                       | Yes                                                                                                                | Yes                                                    | Yes                                                                           | 0                                                                                                                          | 0                                                                                                                                          |
| CT                       | No                                                                                                                 | Yes                                                    | Yes                                                                           | 0                                                                                                                          | 0                                                                                                                                          |
| DE                       | No                                                                                                                 | Yes                                                    | Yes                                                                           | 14                                                                                                                         | 22                                                                                                                                         |
| DC                       | Yes                                                                                                                | Yes                                                    | Yes                                                                           | 0                                                                                                                          | 0                                                                                                                                          |
| FL                       | No                                                                                                                 | Yes                                                    | No                                                                            | 0                                                                                                                          | n/a                                                                                                                                        |
| GA                       | No                                                                                                                 | Yes                                                    | -                                                                             | 0                                                                                                                          | -                                                                                                                                          |
| HI                       | Yes                                                                                                                | Yes                                                    | Yes                                                                           | 0                                                                                                                          | 0                                                                                                                                          |
| ID                       | Yes                                                                                                                | Yes                                                    | -                                                                             | 0                                                                                                                          | -                                                                                                                                          |
| <b>IL</b>                | <b>No</b>                                                                                                          | <b>Yes</b>                                             | <b>Yes</b>                                                                    | <b>16</b>                                                                                                                  | <b>21</b>                                                                                                                                  |
| IN                       | No                                                                                                                 | Yes                                                    | No                                                                            | 1                                                                                                                          | n/a                                                                                                                                        |
| IA                       | No                                                                                                                 | No                                                     | No                                                                            | n/a                                                                                                                        | n/a                                                                                                                                        |
| KS                       | No                                                                                                                 | Yes                                                    | No                                                                            | 0                                                                                                                          | n/a                                                                                                                                        |
| KY                       | No                                                                                                                 | Yes                                                    | -                                                                             | 0                                                                                                                          | -                                                                                                                                          |
| LA                       | No                                                                                                                 | Yes                                                    | Yes                                                                           | 1                                                                                                                          | 0                                                                                                                                          |
| ME                       | No                                                                                                                 | Yes                                                    | Yes                                                                           | 4                                                                                                                          | 4                                                                                                                                          |
| MD                       | No                                                                                                                 | Yes                                                    | -                                                                             | -                                                                                                                          | -                                                                                                                                          |
| MA                       | No                                                                                                                 | Yes                                                    | -                                                                             | 7                                                                                                                          | -                                                                                                                                          |
| MI                       | No                                                                                                                 | Yes                                                    | Yes                                                                           | 0                                                                                                                          | 0                                                                                                                                          |
| MN                       | Yes                                                                                                                | Yes                                                    | -                                                                             | 0                                                                                                                          | -                                                                                                                                          |
| MS                       | No                                                                                                                 | Yes                                                    | -                                                                             | 0                                                                                                                          | -                                                                                                                                          |
| MO                       | -                                                                                                                  | Yes                                                    | Yes                                                                           | 0                                                                                                                          | 0                                                                                                                                          |
| MT                       | Yes                                                                                                                | Yes                                                    | Yes                                                                           | 0                                                                                                                          | 0                                                                                                                                          |

|           |     |     |     |     |     |
|-----------|-----|-----|-----|-----|-----|
| <b>NE</b> | No  | No  | -   | n/a | -   |
| <b>NV</b> | No  | Yes | -   | -   | -   |
| <b>NH</b> | No  | Yes | -   | 0   | -   |
| <b>NJ</b> | No  | Yes | -   | 8   | -   |
| <b>NM</b> | No  | Yes | Yes | 0   | 0   |
| <b>NY</b> | Yes | Yes | No  | 0   | n/a |
| <b>NC</b> | No  | Yes | Yes | 0   | 12  |
| <b>ND</b> | Yes | No  | No  | n/a | n/a |
| <b>OH</b> | Yes | Yes | -   | 0   | -   |
| <b>OK</b> | Yes | Yes | -   | 0   | -   |
| <b>OR</b> | -   | Yes | -   | -   | -   |
| <b>PA</b> | No  | Yes | -   | -   | -   |
| <b>RI</b> | -   | Yes | Yes | 0   | 0   |
| <b>SC</b> | No  | Yes | No  | 0   | n/a |
| <b>SD</b> | No  | No  | -   | n/a | -   |
| <b>TN</b> | No  | Yes | Yes | 0   | 0   |
| <b>TX</b> | Yes | Yes | -   | 0   | -   |
| <b>UT</b> | No  | Yes | No  | 0   | n/a |
| <b>VT</b> | -   | Yes | No  | 0   | n/a |
| <b>VA</b> | No  | Yes | No  | 0   | n/a |
| <b>WA</b> | Yes | Yes | No  | 0   | n/a |
| <b>WV</b> | No  | Yes | Yes | 0   | 0   |
| <b>WI</b> | -   | Yes | Yes | 0   | 0   |
| <b>WY</b> | Yes | Yes | No  | 0   | n/a |

<sup>a</sup>Due to the constantly changing COVID-19 pandemic, some policies documenting the suspension of in-person EI services and/or approval of telehealth services for EI providers have been revised or archived on some official state websites. These states are left blank above.

<sup>b</sup>Although almost all states issued "stay-at-home" directives, only some states specifically mentioned the states' EI program. As such, individual EI programs across some states were responsible for making decisions about the provision of in-person visits during the COVID-19 pandemic. These states are indicated by an "n/a" response.

<sup>c</sup>States that list "0" days indicate that there was no delay (i.e., telehealth was immediately available as an option for families/service providers who wanted to use it). In some instances, telehealth was announced as an option before in-person EI visits were formally suspended.
